# Supplementary material for: Negative autoregulation mitigates collateral RNase activity of repeat-targeting CRISPR-Cas13d in mammalian cells
Source: PubMed Central journal article supplement — Cell Rep. Author manuscript; Available in PMC 2023 Jan 3. (PMC9809062; doi:10.1016/j.celrep.2022.111226), 2022-08-16
Supplement: NIHMS1830646-supplement-1.pdf [file NIHMS1830646-supplement-1.pdf]

**Cell Reports, Volume 40**

**Supplemental information**

**Negative autoregulation mitigates collateral**

**RNase activity of repeat-targeting**

**CRISPR-Cas13d in mammalian cells**

**Chase P. Kelley, Maja C. Haerle, and Eric T. Wang**

## SUPPLEMENTAL FIGURES

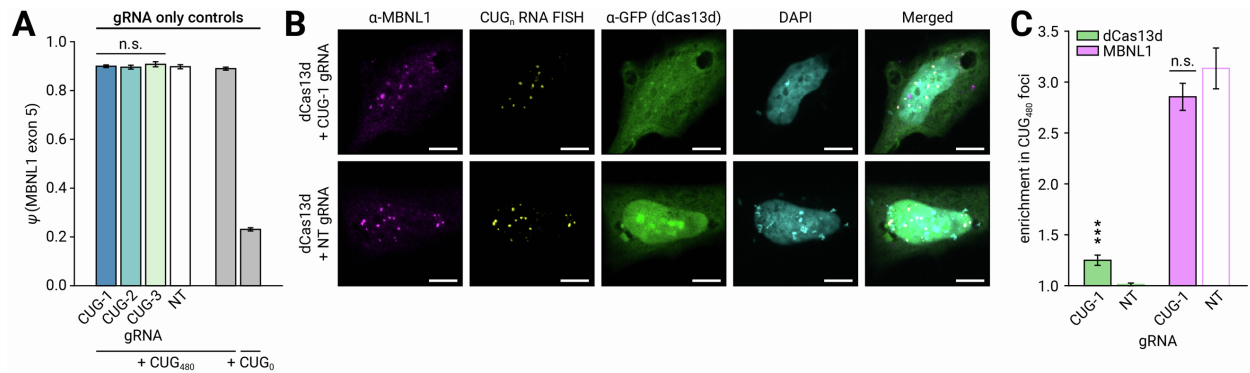

**Figure S1. gRNA only controls for splicing assay and dCas13d/MBNL1 competition, related to Figure 1.** **A** *MBNL1* exon 5 minigene splicing assay after transfection of HeLa cells with gRNA and target plasmids, in the absence of Cas13d. n=3 transfections per condition. n.s.: not significant, p>0.05, two-tailed Student's *t* test. **B** Simultaneous FISH/IF for MBNL1 ( $\alpha$ -MBNL1 IF, magenta), CUG<sub>480</sub> RNA (CAG<sub>10</sub> FISH probe, yellow), and dCas13d-EGFP ( $\alpha$ -GFP IF, green) in transfected HeLa cells. Nuclei stained with DAPI (cyan). Scale bars 10  $\mu$ m. **C** Quantification of colocalization of dCas13d and MBNL1 IF signal with nuclear CUG<sub>480</sub> RNA foci in FISH/IF experiment. n>15 nuclei per condition. \*\*\*p<0.001, two-sided Mann-Whitney *U* test. n.s.: not significant, p>0.05, two-sided Mann-Whitney *U* test.

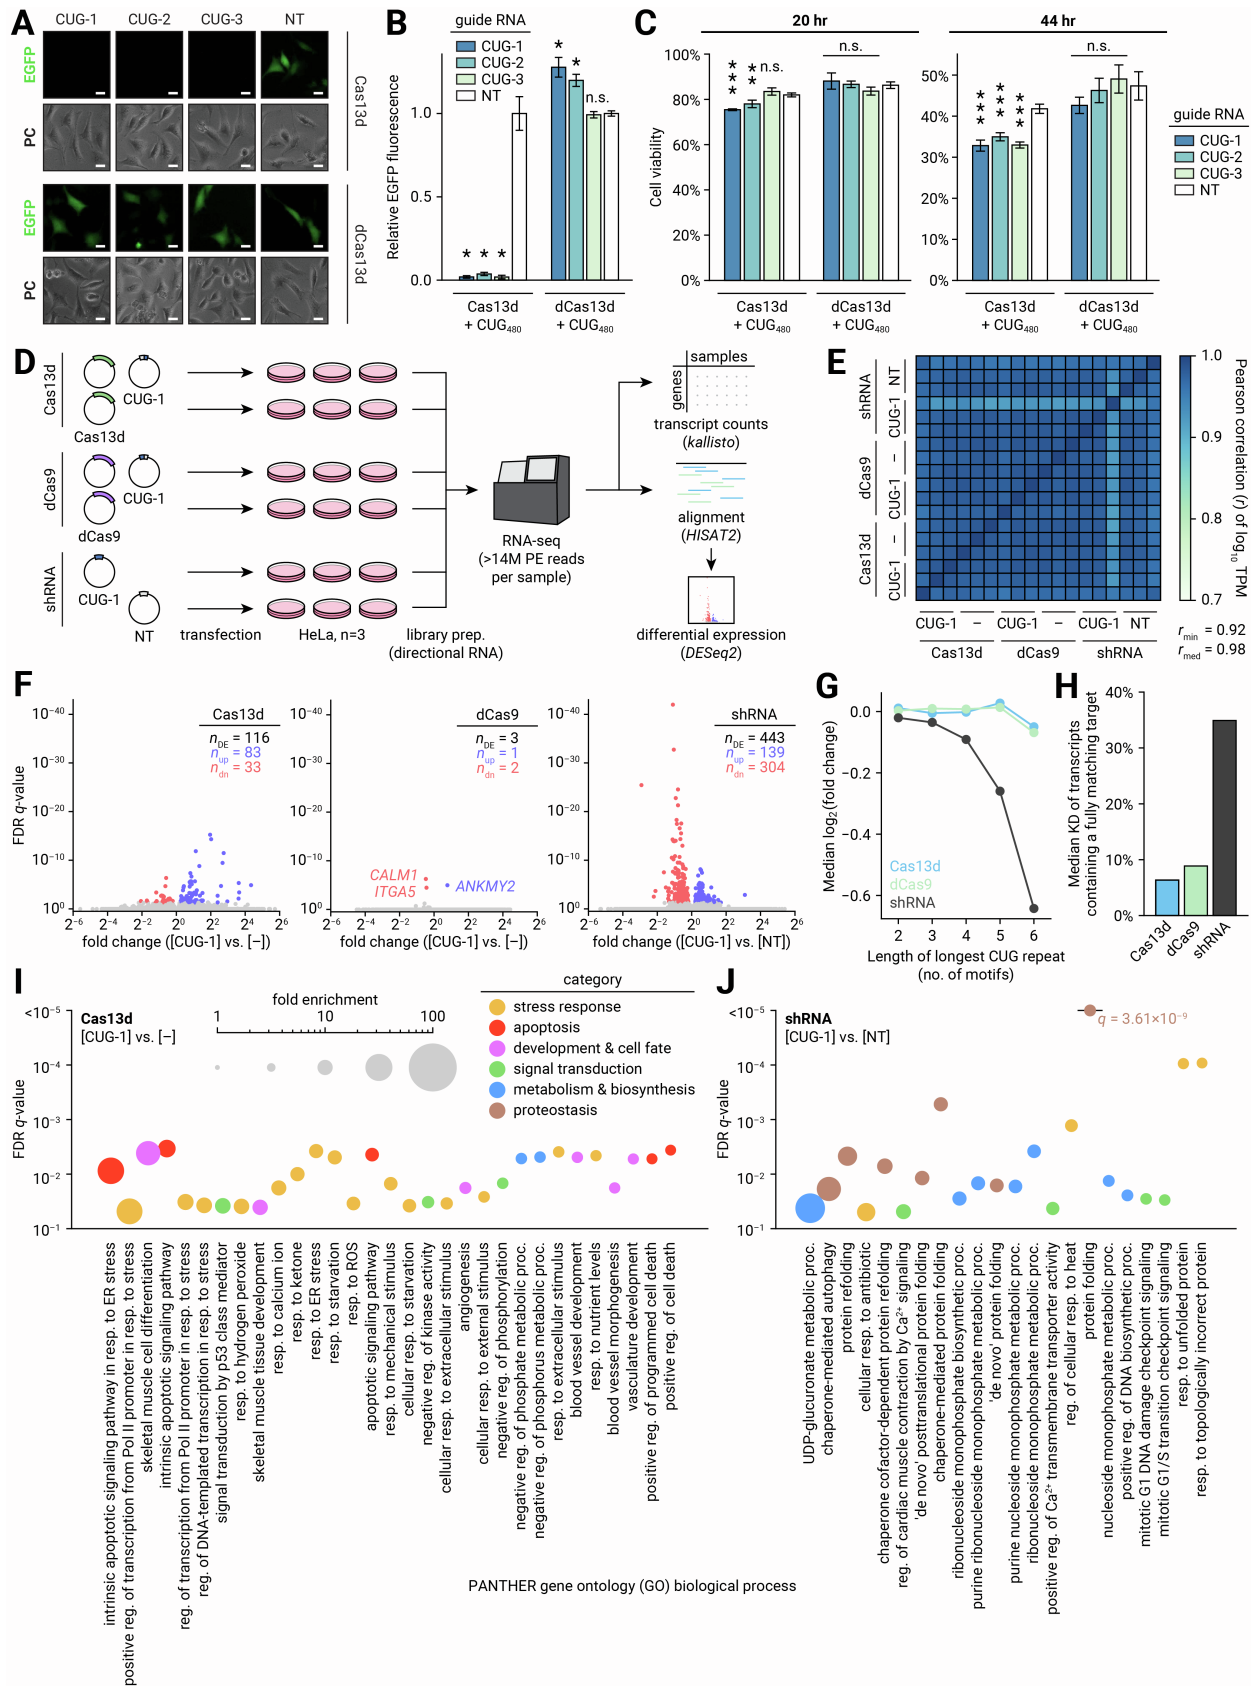

**Figure S2. CUG-targeted Cas13d suppresses EGFP expression and upregulates stress response and apoptosis pathways, related to Figure 2.** **A** Visualization of unfused EGFP marker on Cas13d plasmid 20 hr after transfection with Cas13d, gRNA, and CUG<sub>480</sub> target plasmids. PC: phase contrast. Scale bars 20  $\mu$ m. **B** Quantification of EGFP expression by plate reader 20 hr after transfection. n=3 transfections per condition. Error bars indicate standard deviation. \*p<0.05, two-tailed Student's *t* test. n.s.: not significant, p>0.05. **C** Resazurin cell viability assay performed 20 hr and 44 hr after transfection with Cas13d, gRNA, and CUG<sub>480</sub> target plasmids. n=5 transfections per condition. Error bars indicate standard deviation. \*p<0.05, \*\*p<0.01, \*\*\*p<0.001, two-tailed Student's *t* test. n.s.: not significant, p>0.05. **D** Description of RNA-seq experiment to assess transcriptomic changes induced by Cas13d. HeLa cells were transfected with Cas13d, dCas9, or shRNA in CUG-targeting or non-targeting conditions and incubated for 3 days prior to RNA extraction, library preparation, and sequencing. n=3 transfections per condition. Data were processed using kallisto, HISAT2, and DESeq2 for alignment and differential expression (DE) analysis. **E** Heatmap of correlation coefficients of log<sub>10</sub> TPM between sequencing libraries. **F** Volcano plots of DESeq2 false discovery rate (FDR)-corrected q-value vs. fold change in targeting and non-targeting conditions. DE genes (FDR q<0.05) are highlighted in red (downregulated) or blue (upregulated). **G** Plot of median fold change of transcripts in targeting and non-targeting conditions, binned by maximum CUG repeat length within the transcript in the human reference genome. **H** Median knockdown between targeting and non-targeting conditions of all transcripts containing a CUG repeat as long as or longer than the length of the Cas13d spacer (22 nt). **I** PANTHER gene ontology (GO) analysis of biological processes enriched in the DE genes between CUG-targeting and non-targeting Cas13d conditions. Enriched processes are defined as processes with a ratio of observed to expected genes >5 and FDR q<0.05. For each process, FDR q is plotted on the vertical axis and enrichment is indicated by circle area. Color indicates classification into functional categories. **J** PANTHER GO analysis of processes enriched in DE genes between CUG-targeting and non-targeting shRNA conditions.

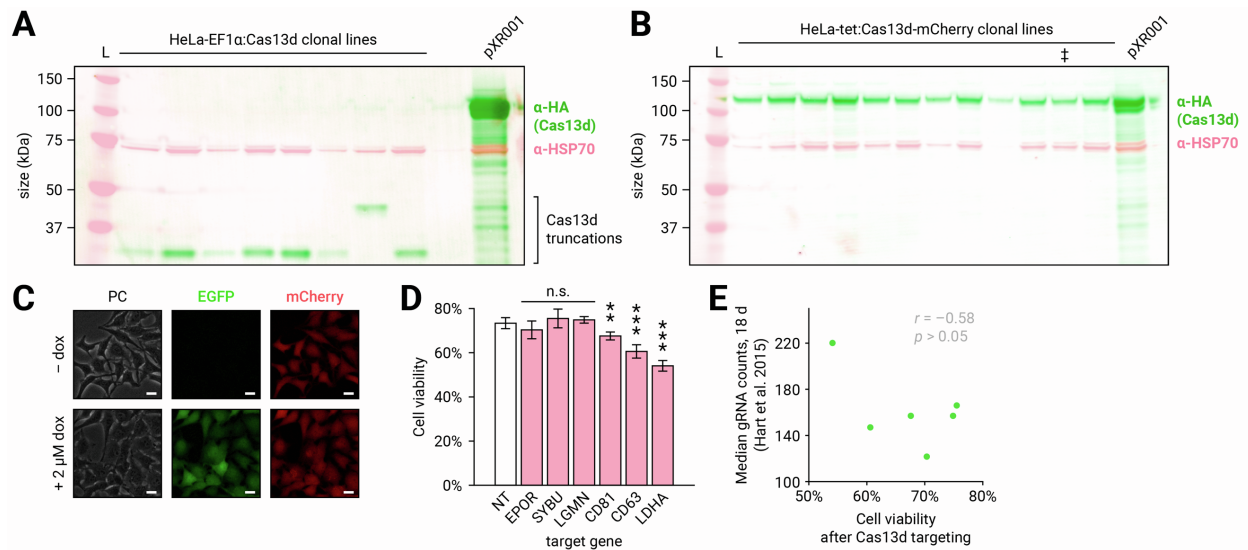

**Figure S3. Development of HeLa-tet:Cas13d-mCherry cell line and cell viability upon targeting endogenous genes, related to Figure 3. A** Fluorescent western blot of protein extracted from clonal HeLa cell lines after treatment with lentivirus encoding Cas13d-T2A-EGFP under the constitutive EF1 $\alpha$  promoter. Blot stained with  $\alpha$ -HA (green) and  $\alpha$ -HSP70 (red) primary antibodies. Expected MW of Cas13d is 117 kDa, lower bands indicate truncations of Cas13d that retained expression of the downstream EGFP marker. L: protein ladder, pXR001: transient transfection of Cas13d plasmid in HeLa. **B** Fluorescent western blot of protein extracted from clonal HeLa cell lines after integration of constitutive mCherry and tetracycline-inducible Cas13d-T2A-EGFP. Expression induced with 2  $\mu$ M doxycycline for 44 hr prior to protein extraction. Blot stained with  $\alpha$ -HA (green) and  $\alpha$ -HSP70 (red) primary antibodies. ‡ indicates the clone chosen for subsequent experiments. L: protein ladder, pXR001: transient transfection of Cas13d plasmid in HeLa. **C** Visualization of EGFP and mCherry before and after 44 hr doxycycline treatment by fluorescence microscopy. PC: phase contrast. Scale bars 20  $\mu$ m. **D** Resazurin cell viability assay of HeLa-tet:Cas13d-mCherry cells transfected with plasmids encoding gRNAs targeting endogenous genes and induced with 2  $\mu$ M doxycycline for 44 hr. n=5 transfections per condition. Error bars indicate standard deviation. \*p<0.05, \*\*p<0.01, \*\*\*p<0.001, two-tailed Student's *t* test. n.s.: not significant, p>0.05. **E** Comparison of cell viability measured 44 hr after Cas13d expression with gRNA targeting endogenous genes vs. depletion of gRNAs targeting the same genes in a CRISPR essentiality screen in HeLa (Hart et al., 2015). Pearson correlation coefficient is shown. n=5 transfections per condition. p>0.05, beta distribution c.d.f.

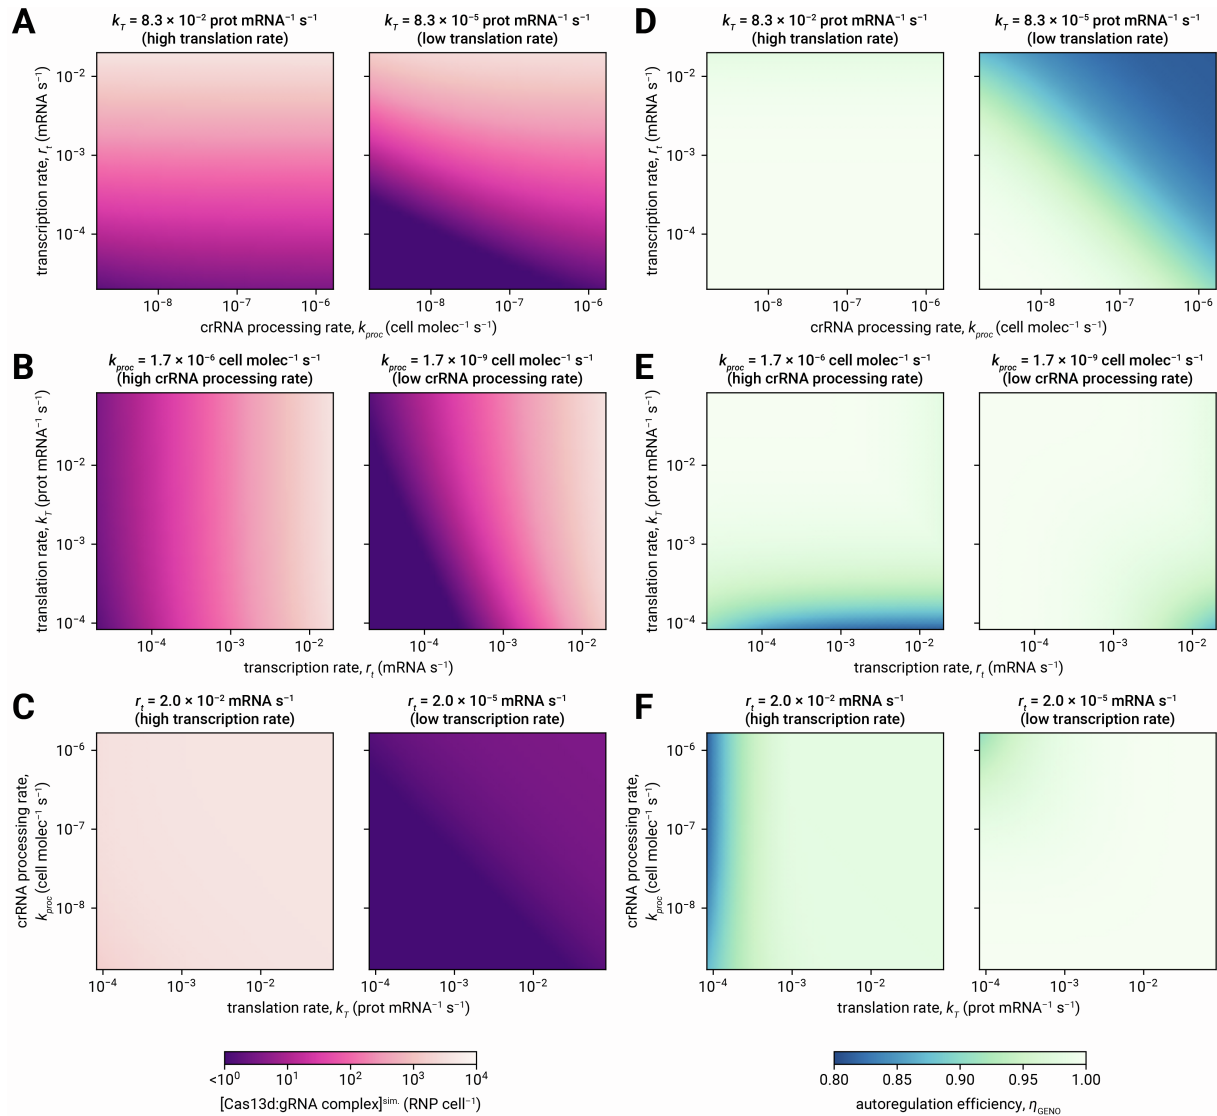

**Figure S4. Prediction of Cas13d binary complex concentration and autoregulation efficiency from simulation of GENO dynamics, related to Figure 4.** **A** Equilibrium Cas13d binary complex concentration as a function of transcription rate and crRNA processing rate, for high (left) and low (right) translation rate. **B** Equilibrium binary complex concentration as a function of translation rate and transcription rate, for high (left) and low (right) crRNA processing rate. **C** Equilibrium binary complex concentration as a function of crRNA processing rate and translation rate, for high (left) and low (right) transcription rate. **D** Autoregulation efficiency ( $\eta_{GENO}$ , defined in Data S1) as a function of transcription rate and crRNA processing rate, for high (left) and low (right) translation rate. **E**  $\eta_{GENO}$  as a function of translation rate and transcription rate, for high (left) and low (right) crRNA processing rate. **F**  $\eta_{GENO}$  as a function of crRNA processing rate and translation rate, for high (left) and low (right) transcription rate.

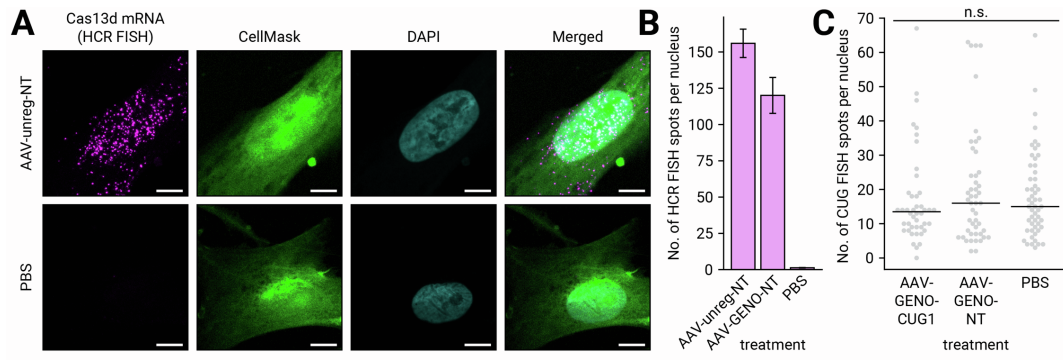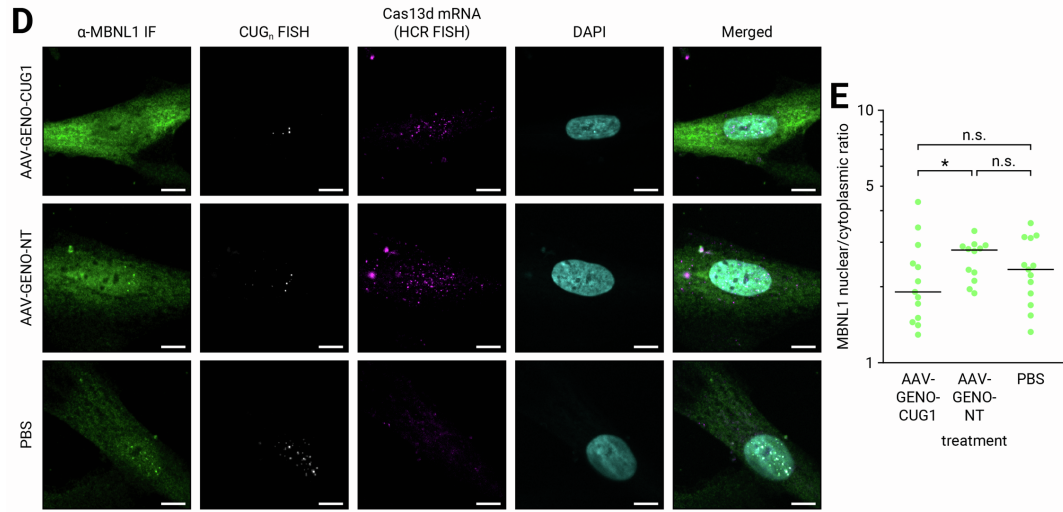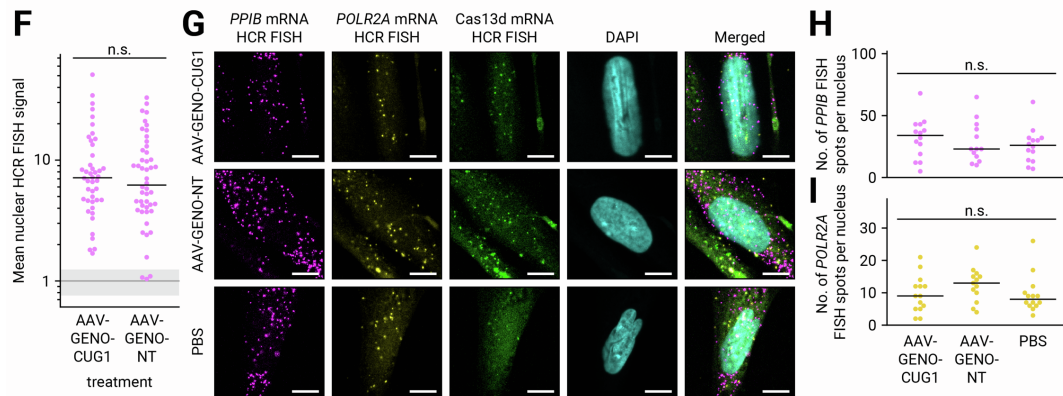

**Figure S5. Detection of diffraction-limited spots in Cas13d HCR FISH and CUG<sub>n</sub> FISH images of AAV-treated DM1 myoblasts, related to Figure 5.** **A** Representative images at 40x magnification of DM1 myoblasts stained for Cas13d mRNA (HCR FISH, magenta) after treatment with AAV for 6 days. Cytoplasm (CellMask, green) and nuclei (DAPI, cyan) are also labeled. Scale bars 10  $\mu$ m. **B** Mean number of Cas13d HCR FISH spots detected in nuclei after AAV treatment. Error bars indicate SEM.  $n > 43$  nuclei per condition, 21 images per condition. **C** Number of CUG<sub>n</sub> FISH spots (RNA foci) detected in each nucleus after AAV treatment. Dots represent individual nuclei, black line indicates median.  $n > 43$  nuclei per condition, 21 images per condition. n.s.: not significant,  $p > 0.05$ , two-sided Mann-Whitney *U* test. **D** Representative images at 40x magnification of DM1 myoblasts labeled with  $\alpha$ -MBNL1 IF (green), CUG<sub>n</sub> FISH (greyscale), and Cas13d HCR FISH (magenta) after treatment with AAV for 6 days. Nuclei (DAPI, cyan) are also labeled. Scale bars 10  $\mu$ m. **E** Nuclear-to-cytoplasmic ratio of MBNL1, calculated from  $\alpha$ -MBNL1 IF for each cell. Dots represent individual cells, black line indicates median.  $n > 11$  cells per condition, 8 images per condition.  $*p < 0.05$ , one-sided Mann-Whitney *U* test. n.s.: not significant,  $p > 0.05$ . **F** Mean nuclear intensity of Cas13d HCR FISH across nuclei in GENO-regulated targeting and non-targeting conditions. Dots represent individual nuclei, black line indicates median.  $n > 43$  nuclei per condition, 21 images per condition. n.s.: not significant,  $p > 0.05$ , two-sided Mann-Whitney *U* test. Grey line indicates mean baseline nuclear FISH signal in PBS-treated myoblasts and grey shaded region indicates standard deviation,  $n = 53$  nuclei, 21 images. **G** Representative images at 40x magnification of DM1 myoblasts labeled with HCR FISH for mRNAs of *PP1B* (magenta), *POLR2A* (yellow), and Cas13d (green) after treatment with AAV for 6 days. Nuclei (DAPI, cyan) are also labeled. Scale bars 10  $\mu$ m. **H** Number of *PP1B* HCR FISH spots detected in each nucleus after AAV treatment. Dots represent individual nuclei, black line indicates median.  $n > 12$  nuclei per condition, 6 images per condition. n.s.: not significant,  $p > 0.05$ , two-sided Mann-Whitney *U* test. **I** Number of *POLR2A* HCR FISH spots detected in each nucleus after AAV treatment. Dots represent individual nuclei, black line indicates median.  $n > 12$  nuclei per condition, 6 images per condition. n.s.: not significant,  $p > 0.05$ , two-sided Mann-Whitney *U* test.



## SUPPLEMENTAL TABLES

**Table S1. List of spacer sequences for RfxCas13d gRNAs used in this study, related to STAR Methods.**

| gRNA ID | Spacer                 |
|---------|------------------------|
| NT      | CGAGGGCGACTTAACCTTAGGT |
| CUG-1   | GCAGCAGCAGCAGCAGCAGCAG |
| CUG-2   | CAGCAGCAGCAGCAGCAGCAGC |
| CUG-3   | AGCAGCAGCAGCAGCAGCAGCA |
| DMPK-1  | CTCGGAGCGGTTGTGAACTGGC |
| DMPK-2  | GGCTACAAGGACCCTTCGAGCC |
| DMPK-3  | GTCCTGTAGCCTGTCAGCGAGT |
| DMPK-4  | GACAGACAATAAATACCGAGGA |
| DMPK-5  | CGGAGTCGAAGACAGTTCTAGG |
| DMPK-6  | CACTTTGCGAACCAACGATAGG |
| DMPK-7  | AACTCCATCCGCTCCTGCAACT |
| DMPK-8  | TCCTCCAGGTGTCTATACACGC |
| MS2-1   | CTAATGAACCCGGGAATACTGC |
| MS2-2   | CTAGGCAATTAGGTACCTTAGG |
| MS2-3   | GTTTTCTAGAGTCGACCTGCAG |
| puro-1  | GTTCCGTAAGTCAATGTG     |
| puro-2  | CAAACACTGCACCTGCTTCAAC |
| puro-3  | CACCATCATCTGCAACCCATAC |
| LDHA    | GACTTGGCAGATGAACTTGCTC |
| CD63    | GCCTGCAAGGAGAACTATTGTC |
| CD81    | CACGTCGCCTTCAACTGTAATC |
| LGMN    | TGCCATGCCTACCAGATCATTG |
| SYBU    | CAGAAAGAGGTGACAGTGAGAC |
| EPOR    | TGACTCTGGCATCTCAACTGAC |

**Table S2. List of transcripts in the human reference genome (hg19) by longest CUG<sub>n</sub> repeat length, related to Figure S2.**

(exceeds page length, uploaded separately)

**Table S3. Mean transcripts per million (TPM) for selected genes in non-transgenic HeLa cells in our RNA-seq study, related to Figure 3.**

| Gene | Average TPM in HeLa (RNA-seq) |
|------|-------------------------------|
| LDHA | 1211.99628                    |
| CD63 | 354.456528                    |
| CD81 | 112.262125                    |
| LGMN | 40.980735                     |
| SYBU | 12.224917                     |
| EPOR | 3.8507395                     |

**Table S4. Primer sequences used in this study, related to STAR Methods.**

| Name      | Sequence               |
|-----------|------------------------|
| RG6_F     | CAAAGTGGAGGACCCAGTACC  |
| RG6_R     | GCGCATGAACTCCTTGATGAC  |
| mCherry_F | GACTACTTGAAGCTGTCCTTCC |
| mCherry_R | CGCAGCTTCACCTTGTAGAT   |
| GAPDH_F   | GGTGAAGGTCGGTGTGAACG   |
| GAPDH_R   | CTCGCTCCTGGAAGATGGTG   |
| CUG480_F  | CGATCTCTGCCTGCTTACTC   |
| CUG480_R  | GTCGGAGGACGAGGTCAATAAA |

## **SUPPLEMENTAL ITEMS**

**Data S1. Dynamical model of Cas13d gRNA excision for negative-autoregulatory optimization (GENO), related to Figure 4.**
