# Supplementary material for: Negative autoregulation mitigates collateral RNase activity of repeat-targeting CRISPR-Cas13d in mammalian cells
Source: PubMed Central journal article supplement — Cell Rep. Author manuscript; Available in PMC 2023 Jan 3. (PMC9809062; doi:10.1016/j.celrep.2022.111226), 2022-08-16
Supplement: NIHMS1830646-supplement-3.pdf [file NIHMS1830646-supplement-3.pdf]

# Supplemental Note: Dynamical model of Cas13d gRNA excision for negative-autoregulatory optimization

Chase P. Kelley, Eric T. Wang

University of Florida

November 19, 2021

## 1 Model description

The following model is proposed to describe the kinetics and equilibria of a Cas13d negative autoregulation strategy mediated by gRNA excision (GENO):

$$\dot{R} = \text{transcription} - \text{processing} - \text{degradation}$$

$$\dot{A} = \text{translation} - \text{processing} - \text{degradation}$$

$$\dot{B} = \text{processing} - \text{degradation}$$

This description relies on the following assumptions:

1. A deterministic model describes the mean dynamics of the underlying stochastic process with reasonable accuracy.
2. gRNA processing is performed by apoprotein only, upon Cas13d:gRNA binary complex formation.
3. Nascent Cas13d translation products quickly diffuse away from the domain of their mRNAs.
4. Cas13d:gRNA binary complex formation is irreversible.
5. Nuclear/cytoplasmic compartmentalization affects crRNA processing negligibly.

These biochemical dynamics and assumptions produce the following differential equation model (GENO):

$$\dot{R} = r_i - k_p RA - \gamma_R R \tag{1.1}$$

$$\dot{A} = k_T R - k_p RA - \gamma_A A \tag{1.2}$$

$$\dot{B} = k_p RA - \gamma_B B \tag{1.3}$$

where:

- $R$ : concentration of Cas13d mRNA
- $A$ : concentration of Cas13d apoprotein
- $B$ : concentration of Cas13d:gRNA binary complex
- $r_t$ : rate of Pol II transcription of Cas13d mRNA
- $k_T$ : rate of translation of Cas13d protein
- $k_p$ : rate of crRNA processing
- $\gamma_i$ : rate of degradation of species  $i$

A reference model (REF) is also presented for comparison, in which autoregulation is absent and gRNA processing and Cas13d expression are independent:

$$\dot{R} = r_t - \gamma_R R \quad (1.4)$$

$$\dot{A} = k_T R - k_p GA - \gamma_A A \quad (1.5)$$

$$\dot{B} = k_p GA - \gamma_B B \quad (1.6)$$

$$\dot{G} = r_G - k_p GA - \gamma_G G \quad (1.7)$$

where:

- $G$ : concentration of unbound gRNA
- $r_G$ : rate of Pol III transcription of gRNA

## 2 Equilibrium analysis

### 2.1 GENO model

At equilibrium, the GENO model reduces to the following:

$$0 = r_t - k_p \hat{R} \hat{A} - \gamma_R \hat{R} \quad (2.1)$$

$$0 = k_T \hat{R} - k_p \hat{R} \hat{A} - \gamma_A \hat{A} \quad (2.2)$$

$$0 = k_p \hat{R} \hat{A} - \gamma_B \hat{B} \quad (2.3)$$

From (2.1),

$$\hat{A} = \frac{r_t - \gamma_R \hat{R}}{k_p \hat{R}} \quad (2.4)$$

By substitution of (2.4) into (2.2),

$$\frac{r_t - \gamma_R \hat{R}}{k_p \hat{R}} = \frac{k_T \hat{R}}{k_p \hat{R} + \gamma_A} \quad (2.5)$$

which reduces to the quadratic equation

$$0 = k_p(k_T + \gamma_R)\hat{R}^2 - (k_p r_t - \gamma_A \gamma_R)\hat{R} - \gamma_A r_t \quad (2.6)$$

The solutions of this quadratic equation are

$$\hat{R} = \frac{k_p r_t - \gamma_A \gamma_R \pm \sqrt{(k_p r_t - \gamma_A \gamma_R)^2 + 4\gamma_A r_t k_p (k_T + \gamma_R)}}{2k_p(k_T + \gamma_R)} \quad (2.7)$$

By inspection,

$$|k_p r_t - \gamma_A \gamma_R| < \sqrt{(k_p r_t - \gamma_A \gamma_R)^2 + 4\gamma_A r_t k_p (k_T + \gamma_R)} \quad (2.8)$$

Therefore, regardless of the sign of the term  $|k_p r_t - \gamma_A \gamma_R|$ , the quadratic equation (2.6) has a single positive solution given by

$$\hat{R} = \frac{k_p r_t - \gamma_A \gamma_R + \sqrt{(k_p r_t - \gamma_A \gamma_R)^2 + 4\gamma_A r_t k_p (k_T + \gamma_R)}}{2k_p(k_T + \gamma_R)} \quad (2.9)$$

Equivalently,

$$\hat{R} = \frac{r_t}{\gamma_R} \left( \frac{k_p \gamma_R - \frac{\gamma_A \gamma_R^2}{r_t} + \sqrt{\left(k_p \gamma_R - \frac{\gamma_A \gamma_R^2}{r_t}\right)^2 + \frac{4k_p k_T \gamma_A \gamma_R^2}{r_t}}}{2k_p(k_T + \gamma_R)} \right) \quad (2.10)$$

From (2.3) and (2.4),

$$\hat{B} = \frac{r_t - \gamma_R \hat{R}}{\gamma_B} \quad (2.11)$$

Thus, the system described by the GENO model has a single equilibrium point  $(\hat{R}^{\text{GENO}}, \hat{A}^{\text{GENO}}, \hat{B}^{\text{GENO}})$  at the solutions provided in (2.10), (2.4), and (2.11).

## 2.2 REF model

At equilibrium, the REF model reduces to the following:

$$0 = r_t - \gamma_R \hat{R} \quad (2.12)$$

$$0 = k_T \hat{R} - k_p \hat{G} \hat{A} - \gamma_A \hat{A} \quad (2.13)$$

$$0 = k_p \hat{G} \hat{A} - \gamma_B \hat{B} \quad (2.14)$$

$$0 = r_G - k_p \hat{G} \hat{A} - \gamma_G \hat{G} \quad (2.15)$$

From (2.12),

$$\hat{R} = \frac{r_t}{\gamma_R} \quad (2.16)$$

From (2.13) and (2.16),

$$\hat{A} = \frac{k_T r_t}{\gamma_R} \left( \frac{1}{k_p \hat{G} + \gamma_A} \right) \quad (2.17)$$

From (2.15),

$$\hat{G} = \frac{r_G}{k_p \hat{A} + \gamma_G} \quad (2.18)$$

Substituting (2.18) into (2.17) yields

$$\hat{A} = \frac{k_T r_t}{\gamma_R} \left( \frac{1}{\frac{k_p r_G}{k_p \hat{A} + \gamma_G} + \gamma_A} \right) \quad (2.19)$$

which simplifies to the quadratic equation

$$\gamma_A k_p \hat{A}^2 + \left( k_p r_G + \gamma_A \gamma_G - \frac{k_T r_t k_p}{\gamma_R} \right) \hat{A} - \frac{k_T r_t \gamma_G}{\gamma_R} = 0 \quad (2.20)$$

As the product of the first and third coefficients is strictly negative, the discriminant is strictly positive. Thus, the polynomial has a single positive real solution for  $\hat{A}$ .

From (2.14),

$$\hat{B} = \frac{k_p \hat{G} \hat{A}}{\gamma_B} \quad (2.21)$$

Substituting (2.17) into (2.21) yields

$$\hat{B} = \frac{k_T r_t}{\gamma_R \gamma_B} \left( \frac{k_p \hat{G}}{k_p \hat{G} + \gamma_A} \right) \quad (2.22)$$

Thus, the system described by the REF model has a single equilibrium point  $(\hat{R}^{\text{REF}}, \hat{A}^{\text{REF}}, \hat{B}^{\text{REF}}, \hat{G}^{\text{REF}})$  with the solution fully constrained by (2.16), (2.20), (2.22), and (2.18), respectively.

Importantly, in the REF model, the concentration of binary complex  $\hat{B}$  takes the form of a Hill function, where  $\lim_{\hat{G} \rightarrow 0} \hat{B} = 0$  and  $\lim_{\hat{G} \rightarrow \infty} \hat{B} = \frac{k_T r_t}{\gamma_R \gamma_B}$ .

The autoregulation efficiency  $\eta_{\text{GENO}}$  is defined as

$$\eta_{\text{GENO}} = \frac{\hat{B}^{\text{REF}} - \hat{B}^{\text{GENO}}}{\hat{B}^{\text{REF}}} \quad (2.23)$$

### 3 Proofs

**Theorem 1.** At equilibrium, negative autoregulation by gRNA excision reduces the expression of the Cas13d mRNA compared to the reference model.

*Proof.* Proof by contradiction. The equilibrium mRNA concentration in the GENO model is provided in (2.10):

$$\hat{R}^{\text{GENO}} = \frac{r_t}{\gamma_R} \left( \frac{k_p \gamma_R - \frac{\gamma_A \gamma_R^2}{r_t} + \sqrt{\left( k_p \gamma_R - \frac{\gamma_A \gamma_R^2}{r_t} \right)^2 + \frac{4k_p k_T \gamma_A \gamma_R^2}{r_t}}}{2k_p(k_T + \gamma_R)} \right)$$

In the REF model, the equilibrium concentration is provided in (2.16):

$$\hat{R}^{\text{REF}} = \frac{r_t}{\gamma_R}$$

Assume  $\hat{R}^{\text{GENO}} \geq \hat{R}^{\text{REF}}$ . Equivalently,

$$\begin{aligned} \frac{k_p \gamma_R - \frac{\gamma_A \gamma_R^2}{r_t} + \sqrt{\left( k_p \gamma_R - \frac{\gamma_A \gamma_R^2}{r_t} \right)^2 + \frac{4k_p k_T \gamma_A \gamma_R^2}{r_t}}}{2k_p(k_T + \gamma_R)} &\geq 1 \\ k_p \gamma_R - \frac{\gamma_A \gamma_R^2}{r_t} + \sqrt{\left( k_p \gamma_R - \frac{\gamma_A \gamma_R^2}{r_t} \right)^2 + \frac{4k_p k_T \gamma_A \gamma_R^2}{r_t}} &\geq 2k_p k_T + 2k_p \gamma_R \\ \sqrt{\left( k_p \gamma_R - \frac{\gamma_A \gamma_R^2}{r_t} \right)^2 + \frac{4k_p k_T \gamma_A \gamma_R^2}{r_t}} &\geq 2k_p k_T + k_p \gamma_R + \frac{\gamma_A \gamma_R^2}{r_t} \\ \left( k_p \gamma_R - \frac{\gamma_A \gamma_R^2}{r_t} \right)^2 + \frac{4k_p k_T \gamma_A \gamma_R^2}{r_t} &\geq \left( 2k_p k_T + k_p \gamma_R + \frac{\gamma_A \gamma_R^2}{r_t} \right)^2 \\ \left( \frac{\gamma_A \gamma_R^2}{r_t} \right)^2 + \frac{2\gamma_A \gamma_R^3 k_p}{r_t} + k_p^2 \gamma_R^2 + \frac{4k_p k_T \gamma_A \gamma_R^2}{r_t} &\geq \left( \frac{\gamma_A \gamma_R^2}{r_t} \right)^2 + \frac{2\gamma_A \gamma_R^3 k_p}{r_t} + \\ &k_p^2 \gamma_R^2 + \frac{4k_p k_T \gamma_A \gamma_R^2}{r_t} + 4k_p^2 k_T \gamma_R + 4k_p^2 k_T^2 \\ 0 &\geq 4k_p^2 k_T \gamma_R + 4k_p^2 k_T^2 \\ 0 &\geq 4k_p^2 k_T (\gamma_R + k_T) \end{aligned}$$

This inequality cannot be satisfied, as all biological parameters in the right-hand term are strictly positive. Therefore,  $\hat{R}^{\text{GENO}} < \hat{R}^{\text{REF}}$ . □

**Theorem 2.** Assume that gRNA is highly expressed in the reference model and is present in excess ( $\hat{G} \gg \gamma_A/k_p$ ), and that Cas13d protein translation is faster than mRNA degradation ( $k_T > \gamma_R$ ). At equilibrium, negative autoregulation by gRNA excision reduces the concentration of active Cas13d:gRNA binary complex compared to the reference model.

*Proof.* Proof by contradiction. The equilibrium binary complex concentration in the GENO model is provided in (2.11):

$$\hat{B}^{\text{GENO}} = \frac{r_t - \gamma_R \hat{R}^{\text{GENO}}}{\gamma_B}$$

In the REF model, the equilibrium concentration is provided in (2.22):

$$\hat{B}^{\text{REF}} = \frac{k_T r_t}{\gamma_R \gamma_B} \left( \frac{k_p \hat{G}^{\text{REF}}}{k_p \hat{G}^{\text{REF}} + \gamma_A} \right)$$

If gRNA is expressed in excess in the REF model, the binary complex equilibrium concentration approaches its maximum value:

$$\lim_{\hat{G} \rightarrow \infty} \hat{B}^{\text{REF}} = \frac{k_T r_t}{\gamma_R \gamma_B}$$

Assume  $\hat{B}^{\text{GENO}} \geq \lim_{\hat{G} \rightarrow \infty} \hat{B}^{\text{REF}}$ . Equivalently,

$$\begin{aligned} \frac{r_t - \gamma_R \hat{R}^{\text{GENO}}}{\gamma_B} &\geq \frac{k_T r_t}{\gamma_R \gamma_B} \\ r_t - \gamma_R \hat{R}^{\text{GENO}} &\geq \frac{k_T r_t}{\gamma_R} \\ 1 - \frac{k_T}{\gamma_R} &\geq \frac{\gamma_R \hat{R}^{\text{GENO}}}{r_t} \end{aligned}$$

The right-hand term of this inequality is strictly positive. However, as  $k_T > \gamma_R$ , the left-hand term is strictly negative. This inequality cannot be satisfied. Thus,  $\hat{B}^{\text{GENO}} < \lim_{\hat{G} \rightarrow \infty} \hat{B}^{\text{REF}}$ , under the following conditions:

1. gRNA expression in the reference system is high and in excess.
2. On average, more than one Cas13d protein molecule is translated from each Cas13d mRNA in the reference system.

□
